# Supplementary material
Source: PubMed Central journal article supplement (PMC3285272)

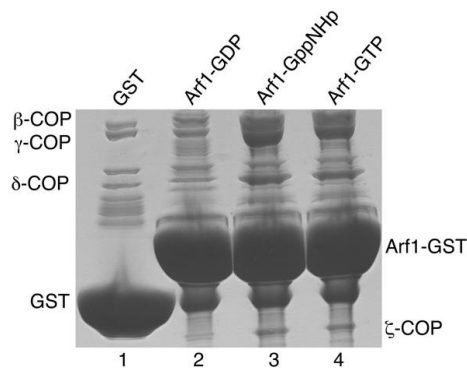

Figure S1, related to Figure 1

**Figure S1, related to Figure 1D. Binding and elution assay to test the interaction between coatomer and Arf1**

This gel shows the result of the first stage of the binding assay. Specifically, GST or Arf1-GST fusion protein was complexed with GDP, GppNHp or GTP and immobilized on glutathione sepharose beads. The beads were incubated with purified  $\beta\delta/\gamma\zeta$ -COP and then washed. Total bound proteins (including the GST proteins) were eluted using SDS sample buffer and analyzed by SDS-PAGE and Coomassie blue staining (see Experimental Procedures).

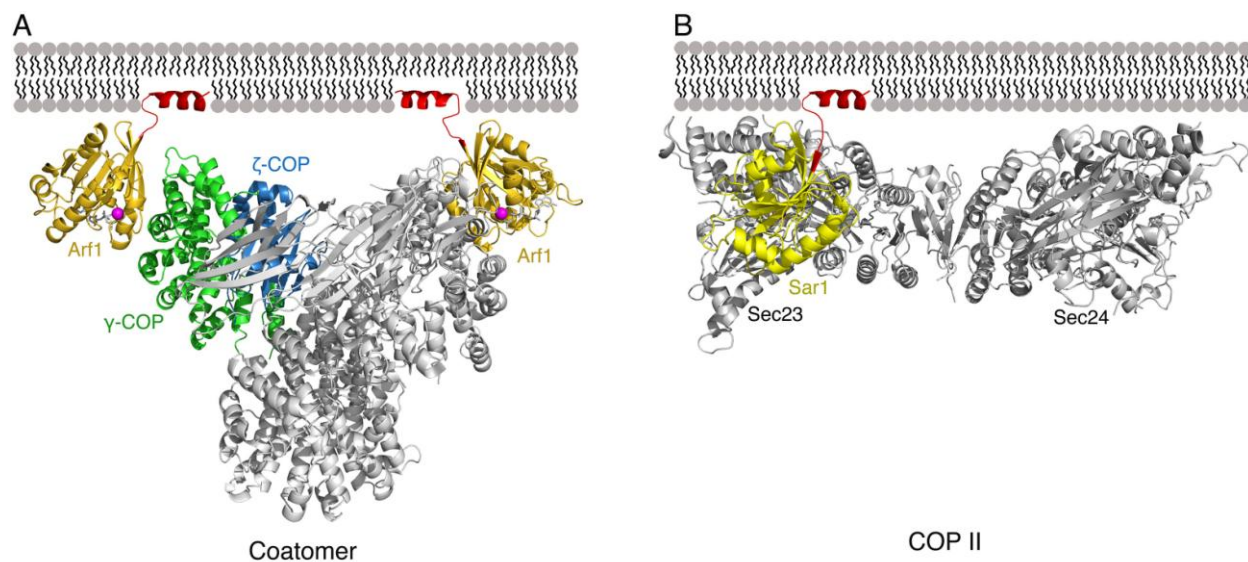

Figure S2, related to Figure 6

**Figure S2, related to Figure 6A. Comparison of models for Membrane Recruitment of COPI and COPII coats**

(A) Left panel shows a composite model of  $\beta\delta/\gamma\zeta$ -COP bound to membrane via two molecules of Arf1-GTP.

(B) The right panel shows a model of the Sec23/24-Sar1 complex bound to membrane, based on the study of Bi et al. (2002). Sar1 is colored yellow.

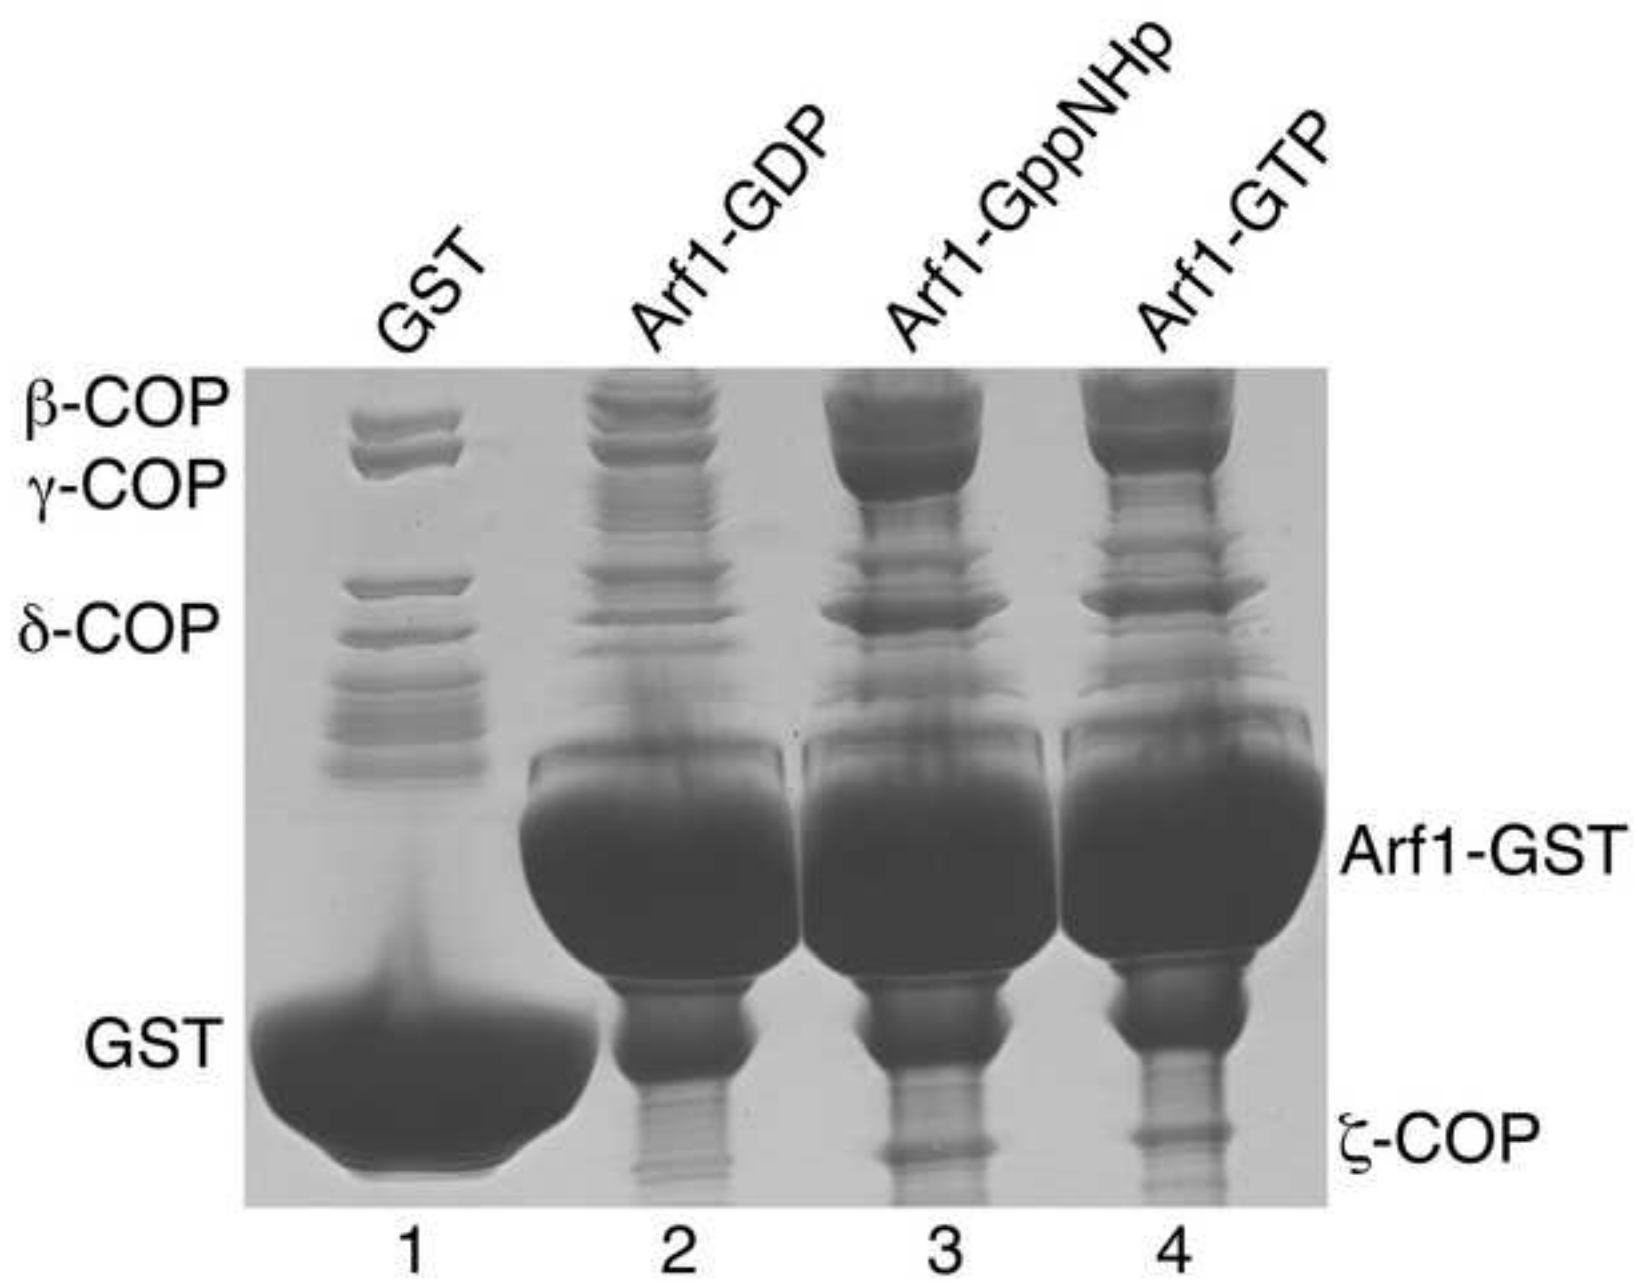

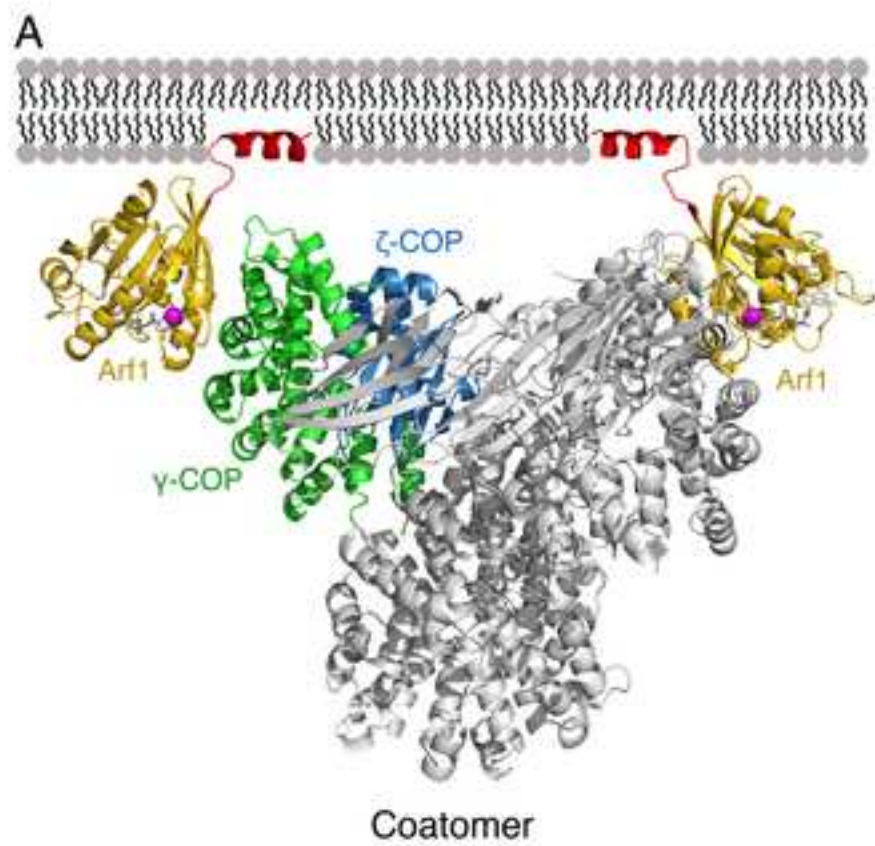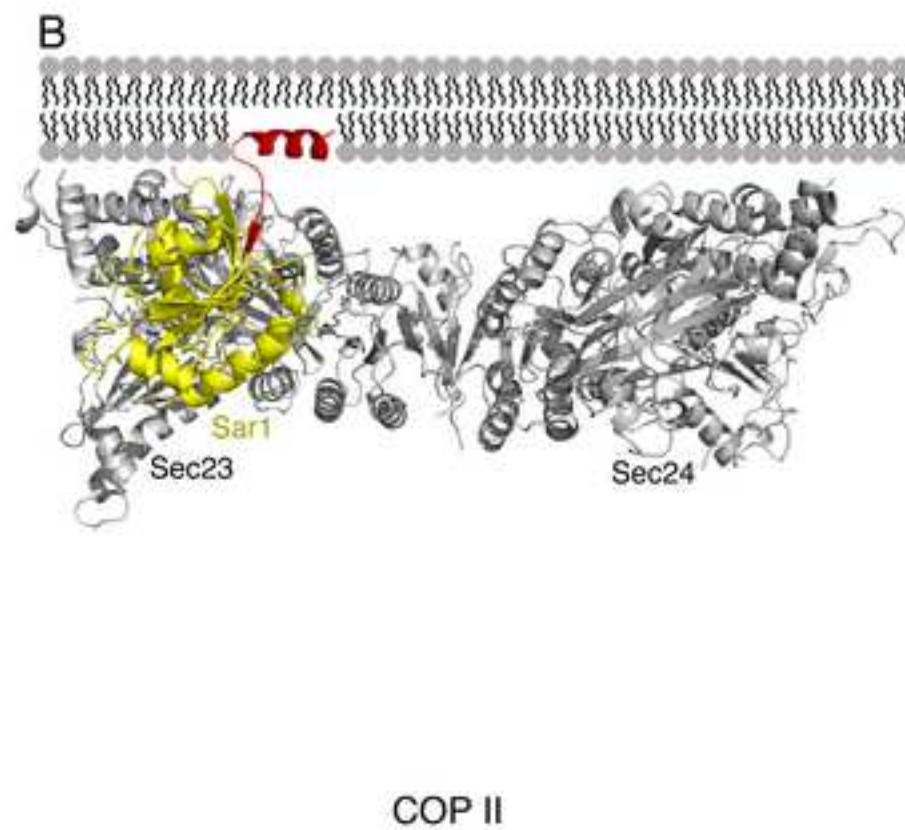

Supplement: NIHMS355071-supplement-01.pdf [file NIHMS355071-supplement-01.pdf]
